# Supplementary material for: Two types of deposits, hyaline droplets and eosinophilic bodies, associated with α2u-globulin accumulation in the rat kidney
Source: PubMed Central journal article supplement — J Toxicol Pathol. 2017 Jul 8;30(4):275–82. doi: 10.1293/tox.2017-0023 (PMC5660949; doi:10.1293/tox.2017-0023), 2017-07-08
Supplement: tox-30-275-s001.pdf [file tox-30-275-s001.pdf]

**Supplementary Table 1.** Summary of the Materials and Adopted Special Stains and Immunostains

|                                                        | Induced                                |                                                       | Spontaneous                            |
|--------------------------------------------------------|----------------------------------------|-------------------------------------------------------|----------------------------------------|
| Number of animals examined                             | 18                                     |                                                       | 3                                      |
|                                                        | Details                                |                                                       | Details                                |
|                                                        | A single administration                |                                                       | Untreated                              |
|                                                        | <i>d</i> -Limonene                     | 3                                                     |                                        |
|                                                        | Vehicle                                | 3                                                     |                                        |
|                                                        | 5 days administration                  |                                                       |                                        |
|                                                        | <i>d</i> -Limonene                     | 3                                                     |                                        |
|                                                        | 10 days administration                 |                                                       |                                        |
|                                                        | <i>d</i> -Limonene                     | 3                                                     |                                        |
|                                                        | 20 days administration                 |                                                       |                                        |
|                                                        | <i>d</i> -Limonene                     | 3                                                     |                                        |
|                                                        | Vehicle                                | 3                                                     |                                        |
| Fixation                                               | Immersion<br>10% NBF<br>(right kidney) | Perfusion<br>Karnovsky-type fixative<br>(left kidney) | Immersion<br>10% NBF<br>(right kidney) |
| Stains                                                 |                                        |                                                       |                                        |
| HE                                                     |                                        | All 18                                                |                                        |
| Azan-Mallory                                           | All 18                                 |                                                       | All 3                                  |
| PAS                                                    |                                        |                                                       |                                        |
| Anti- $\alpha_{2u}$ -globulin<br>with 20-min PPT       |                                        |                                                       |                                        |
| CAB                                                    | 2 of 20-day<br>administered<br>animals | (Not adopted)                                         | 2 of 3 animals                         |
| Anti-LAMP                                              |                                        |                                                       |                                        |
| Anti- $\alpha_{2u}$ -globulin<br>with 5- or 10-min PPT |                                        |                                                       |                                        |

Vehicle, corn oil.

NBF, neutral buffered formalin.

PPT, pronase pretreatment.

CAB, chromotrope-aniline blue.

LAMP, lysosome-associated membrane protein.
